# Supplementary material for: C–H activation of arenes and heteroarenes by early transition metallaborane, [(Cp*Ta)2B5H11] (Cp* = η5-C5Me5)
Source: Royal Society of Chemistry journal article supplement (doi:10.1039/c1cc15394c), 2011-01-01
Supplement: c1cc15394c.pdf [file c1cc15394c.pdf]

## Supporting Information

### C–H Activation of Arenes and Heteroarenes by Early Transition Metallaborane, [(Cp\*Ta)<sub>2</sub>B<sub>5</sub>H<sub>11</sub>] (Cp\* = η<sup>5</sup>-C<sub>5</sub>Me<sub>5</sub>)

Shubhankar Kumar Bose, K. Geetharani and Sundargopal Ghosh\*

Department of Chemistry, Indian Institute of Technology Madras, Chennai 600 036, India

E-mail: sghosh@iitm.ac.in

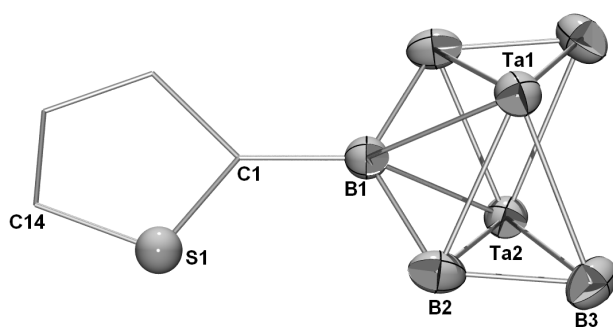

**Figure S1:** Molecular structure of **5** (30% probability ellipsoids). Cp\* ligands, Ta–Ta bond, Ta–H–B and B–H hydrogens are excluded for clarity. Selected bond lengths (Å): Ta1–Ta2, 2.9318(3); Ta1–B1, 2.289(6); B1–B2, 1.750(6); B1–C1, 1.551(11); C1–S1, 1.613(7).

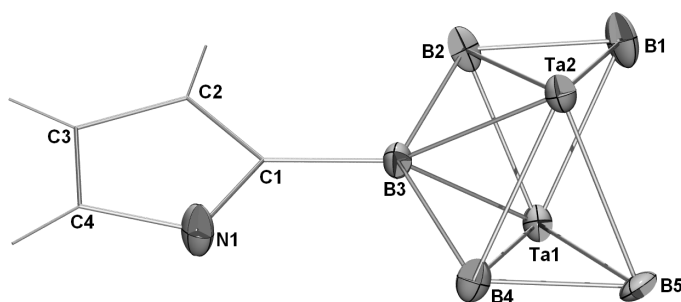

**Figure S2:** Molecular structure of **6** (30% probability ellipsoids). Cp\* ligands and Ta–Ta bond are excluded for clarity. Selected bond lengths (Å): Ta1–Ta2, 2.9171(9); Ta1–B1, 2.44(2); B1–B2, 1.89(3); B3–C1, 1.57(2).

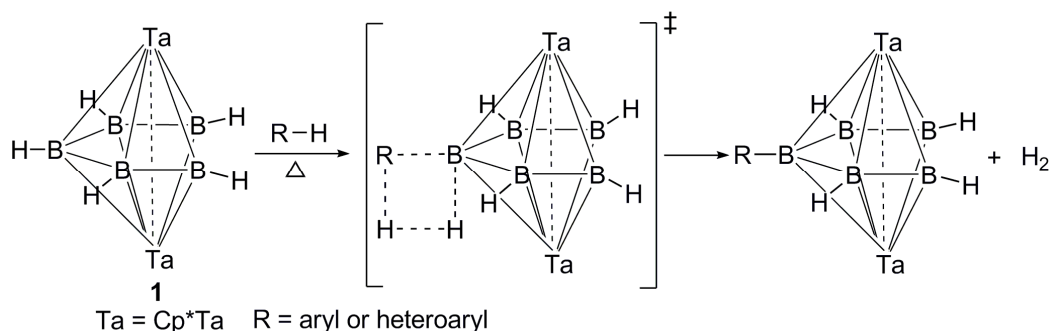

**Scheme S1:** A plausible mechanism for the CH activation of arenes and heteroarenes by **1** (Ta–H–B protons are not shown for clarity).

**General consideration:** All syntheses were carried out under an argon atmosphere with standard Schlenk and glovebox techniques. Solvents were dried by common methods and distilled under N<sub>2</sub> before use. Compound **1** was prepared according to literature method.<sup>1</sup> While other chemicals were obtained commercially and used as received. The external reference for the <sup>11</sup>B NMR, [Bu<sub>4</sub>N(B<sub>3</sub>H<sub>8</sub>)], was synthesized with the literature method.<sup>2</sup> Thin layer chromatography was carried on 250 mm dia aluminum supported silica gel TLC plates (MERCK TLC Plates). NMR spectra were recorded on a 400 and 500 MHz Bruker FT-NMR spectrometer. Residual solvent protons were used as reference ( $\delta$ , ppm, [D<sub>6</sub>]benzene, 7.16), while a sealed tube containing [Bu<sub>4</sub>N(B<sub>3</sub>H<sub>8</sub>)] in [D<sub>6</sub>]benzene ( $\delta_B$ , ppm, –30.07) was used as an external reference for the <sup>11</sup>B NMR. Infrared spectra were recorded on a Nicolet 6700 FT spectrometer. Microanalyses for C, H and N were performed on Perkin Elmer Instruments series II model 2400. Mass spectra were obtained on a Jeol SX 102/Da-600 mass spectrometer with argon/xenon (6kv, 10 mA) as FAB gas.

**Synthesis of 2-6.** In a typical reaction, solution of **1** (0.120 g, 0.17 mmol) in benzene (4 mL) was thermolyzed at 80 °C for 12 h. The solvent was evaporated in vacuo; residue was extracted into hexane

and passed through Celite. After removal of solvent from filtrate, the residue was subjected to chromatographic work up using silica gel TLC plates (eluent: hexane/CH<sub>2</sub>Cl<sub>2</sub> = 90:10 v/v) yielded yellow **2** (0.084 g, 63%). Further, in a similar fashion, the isolated yields of **3-6** from **1** were 75% (0.102 g), 42% (0.058 g), 65% (0.087 g) and 80% (0.105 g) respectively.

**[(Cp\*Ta)<sub>2</sub>B<sub>5</sub>H<sub>10</sub>(C<sub>6</sub>H<sub>5</sub>)], 2:** <sup>1</sup>H NMR (400 MHz, C<sub>6</sub>D<sub>6</sub>, 22 °C): δ = 7.67-7.46 (m, 5H; C<sub>6</sub>H<sub>5</sub>), 5.43 (partially collapsed quartet (pcq), 2BH<sub>t</sub>), 4.39 (pcq, 2BH<sub>t</sub>), 2.16 (s, 30H; Cp\*), -3.75 (br, 2Ta-H-B), -7.21 ppm (br, 4Ta-H-B). <sup>11</sup>B NMR (128 MHz, C<sub>6</sub>D<sub>6</sub>, 22 °C): δ = 51.0 (s, 1B), 20.2 (d, 2B), 3.5 ppm (br, 2B). <sup>13</sup>C NMR (100 MHz, C<sub>6</sub>D<sub>6</sub>, 22 °C): δ = 132.0, 130.7, 128.2, 124.4 (C<sub>6</sub>H<sub>5</sub>), 111.4 (s; C<sub>5</sub>Me<sub>5</sub>), 14.1 ppm (s; C<sub>5</sub>Me<sub>5</sub>). IR (hexane) v/cm<sup>-1</sup>: 2443 (B-H<sub>t</sub>). MS (FAB) P<sup>+</sup>(max): m/z(%) 773. Elemental analysis (%) calcd for C<sub>26</sub>H<sub>45</sub>B<sub>5</sub>Ta<sub>2</sub>: C 40.37, H 5.86; found: C 40.56, H 5.98.

**[(Cp\*Ta)<sub>2</sub>B<sub>5</sub>H<sub>10</sub>(C<sub>6</sub>H<sub>4</sub>CH<sub>3</sub>)], 3:** The proton chemical shifts of the two isomers (*meta:para* in 1:1 ratio) were determined by selective decoupling of peaks in the aromatic region. *m*-(C<sub>6</sub>H<sub>4</sub>CH<sub>3</sub>)(Cp\*Ta)<sub>2</sub>B<sub>5</sub>H<sub>10</sub>. <sup>1</sup>H NMR (400 MHz, C<sub>6</sub>D<sub>6</sub>, 22 °C): δ = 6.80-6.52 (m, 3H; C<sub>6</sub>H<sub>4</sub>), 6.59 (s, 1H; C<sub>6</sub>H<sub>4</sub>), 5.33 (pcq, 2BH<sub>t</sub>), 4.25 (pcq, 2BH<sub>t</sub>), 2.30 (s, 3H; C<sub>6</sub>H<sub>4</sub>CH<sub>3</sub>), 2.08 (s, 30H; Cp\*), -3.35 (br, 2Ta-H-B), -6.81 ppm (br, 4Ta-H-B). <sup>11</sup>B NMR (128 MHz, C<sub>6</sub>D<sub>6</sub>, 22 °C): δ = 51.3 (s, 1B), 20.8 (br, 2B), 4.1 ppm (br, 2B). <sup>13</sup>C NMR (100 MHz, C<sub>6</sub>D<sub>6</sub>, 22 °C): δ = 134.2, 133.8, 131.2, 130.0, 128.2, 124.9 (C<sub>6</sub>H<sub>4</sub>Me), 110.2 (s; C<sub>5</sub>Me<sub>5</sub>), 21.6 (C<sub>6</sub>H<sub>4</sub>Me), 13.0 ppm (s; C<sub>5</sub>Me<sub>5</sub>). *p*-(C<sub>6</sub>H<sub>4</sub>CH<sub>3</sub>)(Cp\*Ta)<sub>2</sub>B<sub>5</sub>H<sub>10</sub>. <sup>1</sup>H NMR (400 MHz, C<sub>6</sub>D<sub>6</sub>, 22 °C): δ = 6.75 (d, 2H; C<sub>6</sub>H<sub>4</sub>), 6.64 (d, 2H; C<sub>6</sub>H<sub>4</sub>), 5.33 (pcq, 2BH<sub>t</sub>), 4.25 (pcq, 2BH<sub>t</sub>), 2.24 (s, 3H; C<sub>6</sub>H<sub>4</sub>CH<sub>3</sub>), 2.08 (s, 30H; Cp\*), -3.35 (br, 2Ta-H-B), -6.81 ppm (br, 4Ta-H-B). <sup>11</sup>B NMR (128 MHz, C<sub>6</sub>D<sub>6</sub>, 22 °C): δ = 51.3 (s, 1B), 20.8 (br, 2B), 4.1 ppm (br, 2B). <sup>13</sup>C NMR (100 MHz, C<sub>6</sub>D<sub>6</sub>, 22 °C): δ = 135.1, 134.0, 126.0, 125.5 (C<sub>6</sub>H<sub>4</sub>Me), 110.2 (s; C<sub>5</sub>Me<sub>5</sub>), 21.0 (C<sub>6</sub>H<sub>4</sub>Me), 13.0 ppm (s; C<sub>5</sub>Me<sub>5</sub>). IR (hexane) v/cm<sup>-1</sup>: 2458 (B-H<sub>t</sub>). MS (FAB) P<sup>+</sup>(max): m/z(%) 787. Elemental analysis (%) calcd for C<sub>27</sub>H<sub>47</sub>B<sub>5</sub>Ta<sub>2</sub>: C 41.17, H 6.01; found: C 41.32, H 6.13.

**[(Cp\*Ta)<sub>2</sub>B<sub>5</sub>H<sub>10</sub>(C<sub>6</sub>H<sub>4</sub>Cl)], 4:** The proton chemical shifts of the two isomers (*meta:para* in 2:1 ratio) were determined by selective decoupling of peaks in the aromatic region. *m*-(C<sub>6</sub>H<sub>4</sub>Cl)(Cp\*Ta)<sub>2</sub>B<sub>5</sub>H<sub>10</sub>. <sup>1</sup>H NMR (400 MHz, C<sub>6</sub>D<sub>6</sub>, 22 °C): δ = 7.72-7.00 (m, 3H; C<sub>6</sub>H<sub>4</sub>), 7.02 (s, 1H; C<sub>6</sub>H<sub>4</sub>), 5.21 (pcq, 2BH<sub>t</sub>), 4.18 (pcq, 2 BH<sub>t</sub>), 2.12 (s, 30H; Cp\*), -3.05 (br, 2Ta-H-B), -6.98 ppm (br, 4Ta-H-B). <sup>11</sup>B NMR (128 MHz, C<sub>6</sub>D<sub>6</sub>, 22 °C): δ = 49.5 (s, 1B), 21.0 (br, 2B), 4.1 ppm (d, 2B). <sup>13</sup>C NMR (100 MHz, C<sub>6</sub>D<sub>6</sub>, 22 °C): δ = 136.1, 135.9, 132.7, 132.0, 128.8, 125.9 (C<sub>6</sub>H<sub>4</sub>Cl), 111.2 (s; C<sub>5</sub>Me<sub>5</sub>), 13.6 ppm (s; C<sub>5</sub>Me<sub>5</sub>). *p*-(C<sub>6</sub>H<sub>4</sub>Cl)(Cp\*Ta)<sub>2</sub>B<sub>5</sub>H<sub>10</sub>. <sup>1</sup>H NMR (400 MHz, C<sub>6</sub>D<sub>6</sub>, 22 °C): δ = 7.46 (d, 2H; C<sub>6</sub>H<sub>4</sub>), 7.04 (d, 2H; C<sub>6</sub>H<sub>4</sub>), 5.21 (pcq, 2BH<sub>t</sub>), 4.18 (pcq, 2BH<sub>t</sub>), 2.12 (s, 30H; Cp\*), -3.05 (br, 2Ta-H-B), -6.98 ppm (br, 4Ta-H-B). <sup>11</sup>B NMR (128 MHz, C<sub>6</sub>D<sub>6</sub>, 22 °C): δ = 49.5 (s, 1B), 21.0 (br, 2B), 4.1 ppm (d, 2B). <sup>13</sup>C NMR (100 MHz, C<sub>6</sub>D<sub>6</sub>, 22 °C): δ = 138.1, 134.4, 131.5, 126.4, (C<sub>6</sub>H<sub>4</sub>Cl), 111.2 (s; C<sub>5</sub>Me<sub>5</sub>), 13.6 ppm (s; C<sub>5</sub>Me<sub>5</sub>). IR (hexane) v/cm<sup>-1</sup>: 2445 (B-H<sub>t</sub>). MS (FAB) P<sup>+</sup>(max): *m/z*(%) 808. Elemental analysis (%) calcd for C<sub>26</sub>H<sub>44</sub>B<sub>5</sub>Cl<sub>1</sub>Ta<sub>2</sub>: C 38.65, H 5.49; found: C 38.92, H 5.62.

**[(Cp\*Ta)<sub>2</sub>B<sub>5</sub>H<sub>10</sub>(C<sub>4</sub>H<sub>3</sub>S)], 5:** <sup>1</sup>H NMR (400 MHz, C<sub>6</sub>D<sub>6</sub>, 22 °C): δ = 6.91 (d, 1H; C<sub>4</sub>H<sub>3</sub>S), 6.74 (dd, 1H; C<sub>4</sub>H<sub>3</sub>S), 6.27 (d, 1H; C<sub>4</sub>H<sub>3</sub>S), 4.65 (pcq, 2BH<sub>t</sub>), 3.91 (pcq, 2BH<sub>t</sub>), 2.20 (s, 30H; Cp\*), -3.65 (br, 2Ta-H-B), -7.12 ppm (br, 4Ta-H-B). <sup>11</sup>B NMR (128 MHz, C<sub>6</sub>D<sub>6</sub>, 22 °C): δ = 45.9 (s, 1B), 20.6 (br, 2B), 3.2 ppm (d, 2B). <sup>13</sup>C NMR (100 MHz, C<sub>6</sub>D<sub>6</sub>, 22 °C): δ = 131.0, 129.0, 127.2, 124.7 (C<sub>4</sub>H<sub>3</sub>S), 111.6 (s; C<sub>5</sub>Me<sub>5</sub>), 12.8 ppm (s; C<sub>5</sub>Me<sub>5</sub>). IR (hexane) v/cm<sup>-1</sup>: 2450 (B-H<sub>t</sub>). MS (FAB) P<sup>+</sup>(max): *m/z*(%) 779. Elemental analysis (%) calcd for C<sub>24</sub>H<sub>43</sub>B<sub>5</sub>S<sub>1</sub>Ta<sub>2</sub>: C 36.97, H 5.56; found: C 37.15, H 5.71.

**[(Cp\*Ta)<sub>2</sub>B<sub>5</sub>H<sub>10</sub>(C<sub>4</sub>H<sub>3</sub>NH)], 6:** <sup>1</sup>H NMR (400 MHz, C<sub>6</sub>D<sub>6</sub>, 22 °C): δ = 6.47 (d, 1H; C<sub>4</sub>H<sub>3</sub>NH), 5.96 (dd, 1H; C<sub>4</sub>H<sub>3</sub>NH), 5.45 (d, 1H; C<sub>4</sub>H<sub>3</sub>NH), 4.80 (pcq, 2BH<sub>t</sub>), 4.13 (br, C<sub>4</sub>H<sub>3</sub>NH), 3.79 (pcq, 2BH<sub>t</sub>), 2.18 (s, 30H; Cp\*), -4.15 (br, 2Ta-H-B), -6.96 ppm (br, 4Ta-H-B). <sup>11</sup>B NMR (128 MHz, C<sub>6</sub>D<sub>6</sub>, 22 °C): δ = 45.4 (s, 1B), 20.9 (br, 2B), 2.5 ppm (br, 2B). <sup>13</sup>C NMR (100 MHz, C<sub>6</sub>D<sub>6</sub>, 22 °C): δ = 118.1, 115.0, 114.2, 108.7 (C<sub>4</sub>H<sub>3</sub>NH), 111.5 (s; C<sub>5</sub>Me<sub>5</sub>), 12.7 ppm (s; C<sub>5</sub>Me<sub>5</sub>). IR (hexane) v/cm<sup>-1</sup>: 3417 (N-H), 2454 (B-H<sub>t</sub>).

MS (FAB) P<sup>+</sup>(max): *m/z*(%) 762. Elemental analysis (%) calcd for C<sub>24</sub>H<sub>44</sub>B<sub>5</sub>N<sub>1</sub>Ta<sub>2</sub>: C 37.80, H 5.82; found: C 37.53, H 5.64.

**[(Cp\*Ta)<sub>2</sub>B<sub>5</sub>H<sub>10</sub>(C<sub>6</sub>H<sub>4</sub>Br)] (Table 1, entry 4):** The proton chemical shifts of the two isomers (*meta:para* in 2:1 ratio) were determined by selective decoupling of peaks in the aromatic region. *m*-(C<sub>6</sub>H<sub>4</sub>Br)(Cp\*Ta)<sub>2</sub>B<sub>5</sub>H<sub>10</sub>. <sup>1</sup>H NMR (400 MHz, C<sub>6</sub>D<sub>6</sub>, 22 °C): δ = 7.75-7.18 (m, 3H; C<sub>6</sub>H<sub>4</sub>), 7.21 (s, 1H, C<sub>6</sub>H<sub>4</sub>), 5.20 (pcq, 2BH<sub>t</sub>), 4.18 (pcq, 2BH<sub>t</sub>), 2.22 (s, 30H; Cp\*), -3.45 (br, 2Ta-H-B), -7.08 ppm (br, 4Ta-H-B). <sup>11</sup>B NMR (128 MHz, C<sub>6</sub>D<sub>6</sub>, 22 °C): δ = 47.1 (s, 1B), 22.1 (br, 2B), 4.3 ppm (d, 2B). *p*-(C<sub>6</sub>H<sub>4</sub>Br)(Cp\*Ta)<sub>2</sub>B<sub>5</sub>H<sub>10</sub>. <sup>1</sup>H NMR (400 MHz, C<sub>6</sub>D<sub>6</sub>, 22 °C): δ = 7.51 (d, 2H; C<sub>6</sub>H<sub>4</sub>), 7.19 (d, 2H; C<sub>6</sub>H<sub>4</sub>), 5.20 (pcq, 2BH<sub>t</sub>), 4.18 (pcq, 2BH<sub>t</sub>), 2.22 (s, 30H; Cp\*), -3.45 (br, 2Ta-H-B), -7.08 ppm (br, 4Ta-H-B). <sup>11</sup>B NMR (128 MHz, C<sub>6</sub>D<sub>6</sub>, 22 °C): δ = 47.1 (s, 1B), 22.1 (br, 2B), 4.3 ppm (d, 2B). IR (hexane) v/cm<sup>-1</sup>: 2474 (B-H<sub>t</sub>). MS (FAB) P<sup>+</sup>(max): *m/z*(%) 852. Elemental analysis (%) calcd for C<sub>26</sub>H<sub>44</sub>B<sub>5</sub>Br<sub>1</sub>Ta<sub>2</sub>: C 36.63, H 5.20; found: C 35.81, H 4.96.

**[(Cp\*Ta)<sub>2</sub>B<sub>5</sub>H<sub>10</sub>(C<sub>6</sub>H<sub>4</sub>I)] (entry 5):** The proton chemical shifts of the two isomers (*meta:para* in 2:1 ratio) were determined by selective decoupling of peaks in the aromatic region. *m*-(C<sub>6</sub>H<sub>4</sub>I)(Cp\*Ta)<sub>2</sub>B<sub>5</sub>H<sub>10</sub>: <sup>1</sup>H NMR (400 MHz, C<sub>6</sub>D<sub>6</sub>, 22 °C): δ = 7.80-7.15 (m, 3H; C<sub>6</sub>H<sub>4</sub>), 7.32 (s, 1H, C<sub>6</sub>H<sub>4</sub>), 5.08 (pcq, 2BH<sub>t</sub>), 4.38 (pcq, 2BH<sub>t</sub>), 2.34 (s, 30H; Cp\*), -3.23 (br, 2Ta-H-B), -6.41 ppm (br, 4Ta-H-B); <sup>11</sup>B NMR (128 MHz, C<sub>6</sub>D<sub>6</sub>, 22 °C): δ = 46.8 (s, 1B), 20.8 (br, 2B), 5.5 ppm (br, 2B); *p*-(C<sub>6</sub>H<sub>4</sub>I)(Cp\*Ta)<sub>2</sub>B<sub>5</sub>H<sub>10</sub>: <sup>1</sup>H NMR (400 MHz, C<sub>6</sub>D<sub>6</sub>, 22 °C): δ = 7.38 (d, 2H; C<sub>6</sub>H<sub>4</sub>), 7.08 (d, 2H; C<sub>6</sub>H<sub>4</sub>), 5.08 (pcq, 2BH<sub>t</sub>), 4.38 (pcq, 2BH<sub>t</sub>), 2.34 (s, 30H; Cp\*), -3.23 (br, 2Ta-H-B), -6.41 ppm (br, 4Ta-H-B); <sup>11</sup>B NMR (128 MHz, C<sub>6</sub>D<sub>6</sub>, 22 °C): δ = 46.8 (s, 1B), 20.8 (br, 2B), 5.5 ppm (br, 2B); IR (hexane) v/cm<sup>-1</sup>: 2499 (B-H<sub>t</sub>). Elemental analysis (%) calcd for C<sub>26</sub>H<sub>44</sub>B<sub>5</sub>I<sub>1</sub>Ta<sub>2</sub>: C 34.72, H 4.93; found: C 33.81, H 4.45.

**[(Cp\*Ta)<sub>2</sub>B<sub>5</sub>H<sub>10</sub>(C<sub>6</sub>H<sub>3</sub>Me<sub>2</sub>)] (entry 6):** <sup>1</sup>H NMR (400 MHz, C<sub>6</sub>D<sub>6</sub>, 22 °C): δ = 7.20-7.15 (m, 3H; C<sub>6</sub>H<sub>3</sub>), 5.01 (pcq, 2BH<sub>t</sub>), 4.51 (pcq, 2BH<sub>t</sub>), 2.29 (s, 3H; C<sub>6</sub>H<sub>3</sub>Me<sub>2</sub>), 2.24 (s, 3H; C<sub>6</sub>H<sub>3</sub>Me<sub>2</sub>), 2.18 (s, 30H;

Cp\*), -3.68 (br, 2Ta-H-B), -7.08 ppm (br, 4Ta-H-B).  $^{11}\text{B}$  NMR (128 MHz,  $\text{C}_6\text{D}_6$ , 22 °C):  $\delta = 50.5$  (s, 1B), 21.8 (br, 2B), 4.5 ppm (br, 2B). IR (hexane)  $\nu/\text{cm}^{-1}$ : 2451 (B-H<sub>t</sub>). MS (FAB) P<sup>+</sup>(max):  $m/z(\%)$  801.

**[(Cp\*Ta)<sub>2</sub>B<sub>5</sub>H<sub>10</sub>(C<sub>4</sub>H<sub>2</sub>MeS)] (entry 9):**  $^1\text{H}$  NMR (400 MHz,  $\text{C}_6\text{D}_6$ , 22 °C):  $\delta = 6.53$  (d, 1H; C<sub>4</sub>H<sub>2</sub>), 5.74 (d, 1H; C<sub>4</sub>H<sub>2</sub>), 5.16 (pcq, 2BH<sub>t</sub>), 4.07 (pcq, 2BH<sub>t</sub>), 2.42 (s, 3H; C<sub>4</sub>H<sub>2</sub>Me), 2.17 (s, 30H; Cp\*), -3.02 (br, 2Ta-H-B), -6.98 ppm (br, 4Ta-H-B).  $^{11}\text{B}$  NMR (128 MHz,  $\text{C}_6\text{D}_6$ , 22 °C):  $\delta = 46.5$  (s, 1B), 20.0 (d, 2B), 2.9 ppm (br, 2B). IR (hexane)  $\nu/\text{cm}^{-1}$ : 2468 (B-H<sub>t</sub>). MS (FAB) P<sup>+</sup>(max):  $m/z(\%)$  793.

**[(Cp\*Ta)<sub>2</sub>B<sub>5</sub>H<sub>10</sub>(C<sub>4</sub>H<sub>2</sub>IS)] (entry 10):**  $^1\text{H}$  NMR (400 MHz,  $\text{C}_6\text{D}_6$ , 22 °C):  $\delta = 7.38$  (d, 1H; C<sub>4</sub>H<sub>2</sub>), 6.95 (d, 1H; C<sub>4</sub>H<sub>2</sub>), 5.10 (pcq, 2BH<sub>t</sub>), 4.22 (pcq, 2BH<sub>t</sub>), 2.11 (s, 30H; Cp\*), -3.32 (br, 2Ta-H-B), -6.74 ppm (br, 4Ta-H-B).  $^{11}\text{B}$  NMR (128 MHz,  $\text{C}_6\text{D}_6$ , 22 °C):  $\delta = 46.2$  (s, 1B), 21.2 (d, 2B), 3.4 ppm (br, 2B). IR (hexane)  $\nu/\text{cm}^{-1}$ : 2485 (B-H<sub>t</sub>). MS (FAB) P<sup>+</sup>(max):  $m/z(\%)$  905.

**[(Cp\*Ta)<sub>2</sub>B<sub>5</sub>H<sub>10</sub>(C<sub>4</sub>HMe<sub>2</sub>S)] (entry 11):**  $^1\text{H}$  NMR (400 MHz,  $\text{C}_6\text{D}_6$ , 22 °C):  $\delta = 6.79$  (s, 1H; C<sub>4</sub>H), 5.32 (pcq, 2BH<sub>t</sub>), 4.28 (pcq, 2BH<sub>t</sub>), 2.47 (m, 6H; C<sub>4</sub>HMe<sub>2</sub>), 2.08 (s, 30H; Cp\*), -3.75 (br, 2Ta-H-B), -7.14 ppm (br, 4Ta-H-B).  $^{11}\text{B}$  NMR (128 MHz,  $\text{C}_6\text{D}_6$ , 22 °C):  $\delta = 45.0$  (s, 1B), 21.8 (br, 2B), 6.2 ppm (br, 2B). IR (hexane)  $\nu/\text{cm}^{-1}$ : 2492 (B-H<sub>t</sub>). Elemental analysis (%) calcd for C<sub>26</sub>H<sub>47</sub>B<sub>5</sub>S<sub>1</sub>Ta<sub>2</sub>: C 38.66, H 5.87; found: C 37.65, H 5.16.

**[(Cp\*Ta)<sub>2</sub>B<sub>5</sub>H<sub>10</sub>(C<sub>4</sub>HBr<sub>2</sub>S)] (entry 12):**  $^1\text{H}$  NMR (400 MHz,  $\text{C}_6\text{D}_6$ , 22 °C):  $\delta = 7.12$  (d, 1H; C<sub>4</sub>H), 5.12 (pcq, 2BH<sub>t</sub>), 4.10 (pcq, 2BH<sub>t</sub>), 2.33 (s, 30H; Cp\*), -3.90 (br, 2Ta-H-B), -7.05 ppm (br, 4Ta-H-B).  $^{11}\text{B}$  NMR (128 MHz,  $\text{C}_6\text{D}_6$ , 22 °C):  $\delta = 49.6$  (s, 1B), 20.1 (br, 2B), 4.3 ppm (d, 2B). IR (hexane)  $\nu/\text{cm}^{-1}$ : 2462 (B-H<sub>t</sub>). MS (FAB) P<sup>+</sup>(max):  $m/z(\%)$  937. Elemental analysis (%) calcd for C<sub>24</sub>H<sub>41</sub>B<sub>5</sub>Br<sub>2</sub>S<sub>1</sub>Ta<sub>2</sub>: C 30.75, H 4.41; found: C 29.94, H 4.05.

**[(Cp\*Ta)<sub>2</sub>B<sub>5</sub>H<sub>10</sub>(C<sub>4</sub>HMe<sub>2</sub>NH)] (entry 13):**  $^1\text{H}$  NMR (400 MHz,  $\text{C}_6\text{D}_6$ , 22 °C):  $\delta = 5.94$  (d, 1H; C<sub>4</sub>H), 5.22 (pcq, 2BH<sub>t</sub>), 5.08 (br, 1H, C<sub>4</sub>HMe<sub>2</sub>NH), 4.28 (pcq, 2BH<sub>t</sub>), 2.18 (s, 30H; Cp\*), 2.04 (m, 6H; C<sub>4</sub>HMe<sub>2</sub>NH), -3.81 (br, 2Ta-H-B), -7.15 ppm (br, 4Ta-H-B).  $^{11}\text{B}$  NMR (128 MHz,  $\text{C}_6\text{D}_6$ , 22 °C):  $\delta =$

43.4 (s, 1B), 22.0 (br, 2B), 5.3 ppm (d, 2B). IR (hexane)  $\nu/\text{cm}^{-1}$ : 3450 (N–H), 2465 (B–H<sub>t</sub>). Elemental analysis (%) calcd for C<sub>26</sub>H<sub>48</sub>B<sub>5</sub>N<sub>1</sub>Ta<sub>2</sub>: C 39.50, H 6.12; found: C 38.94, H 5.85.

**[(Cp\*Ta)<sub>2</sub>B<sub>5</sub>H<sub>10</sub>{C<sub>4</sub>H<sub>3</sub>NSi(*i*Pr)<sub>3</sub>}] (entry 14):** <sup>1</sup>H NMR (400 MHz, C<sub>6</sub>D<sub>6</sub>, 22 °C):  $\delta$  = 6.49 (s, 1H; C<sub>4</sub>H<sub>3</sub>), 5.94 (d, 1H; C<sub>4</sub>H<sub>3</sub>), 5.61 (d, 1H; C<sub>4</sub>H<sub>3</sub>), 5.00 (pcq, 2BH<sub>t</sub>), 4.20 (pcq, 2BH<sub>t</sub>), 2.28 (s, 30H; Cp\*), 1.34 (m, 3H; 3CHMe<sub>2</sub>), 1.01 (d, 18H; 3CHMe<sub>2</sub>), –4.19 (br, 2Ta–H–B), –7.25 ppm (br, 4Ta–H–B). <sup>11</sup>B NMR (128 MHz, C<sub>6</sub>D<sub>6</sub>, 22 °C):  $\delta$  = 46.6 (s, 1B), 22.2 (br, 2B), 3.3 ppm (br, 2B). IR (hexane)  $\nu/\text{cm}^{-1}$ : 2448 (B–H<sub>t</sub>). MS (FAB) P<sup>+</sup>(max): *m/z*(%) 918.

**Isotope Effect Measurement.** The tantalaborane **1** (0.050 g, 0.07 mmol) was added to an NMR sample tube as a solid. Equimolar amounts of benzene (0.30 mL) and benzene-*d*<sub>6</sub> (0.30 mL) were added to the tube by syringe, and the tube was flame-sealed. The reaction was monitored by <sup>1</sup>H NMR spectroscopy at 80 °C. The rate constants were benzene,  $k = 41.25 \times 10^{-2} \text{ hr}^{-1}$ ; benzene-*d*<sub>6</sub>,  $k = 29.45 \times 10^{-2} \text{ hr}^{-1}$ . These rate constants correspond to a kinetic isotope effect  $k_{\text{H}}/k_{\text{D}}$  of 1.4.

**X-ray Structure Determination.** Crystallographic informations for **2**, **5** and **6** are listed in Table S1. The crystal data for **2** were collected and integrated using Bruker Axs kappa apex2 CCD diffractometer, with graphite monochromated Mo–K $\alpha$  ( $\lambda = 0.71073 \text{ \AA}$ ) radiation at 293 K. Several attempts to grow good X-ray-quality single crystals of **6** by the slow evaporation of hexane at –5 °C were unsuccessful. However, by using a mixed-solvent system (hexane/toluene, 9:1 v/v) we managed to grow crystals of **6** at –20 °C. Crystal data for **5** and **6** were collected on an OXFORD DIFFRACTION XCALIBUR-S CCD system equipped with graphite-monochromated Mo<sub>K $\alpha$</sub>  radiation at 150 K. The structures were solved by heavy atom methods using SHELXS-97 or SIR92<sup>3</sup> and refined using SHELXL-97.<sup>4,5</sup> CCDC-814966 (**2**), CCDC-814964 (**5**) and CCDC-814965 (**6**) contain the supplementary crystallographic data for this paper. These data can be obtained free of charge from the Cambridge Crystallographic Data Centre via [www.ccdc.cam.ac.uk/data\\_request/cif](http://www.ccdc.cam.ac.uk/data_request/cif).

**Table S1.** Crystallographic Data and Structure Refinement Information for **2**, **5** and **6**.

|                                                              | <b>2</b>                                                       | <b>5</b>                                                        | <b>6</b>                                                        |
|--------------------------------------------------------------|----------------------------------------------------------------|-----------------------------------------------------------------|-----------------------------------------------------------------|
| empirical formula                                            | C <sub>26</sub> H <sub>45</sub> B <sub>5</sub> Ta <sub>2</sub> | C <sub>24</sub> H <sub>43</sub> B <sub>5</sub> STa <sub>2</sub> | C <sub>24</sub> H <sub>43</sub> B <sub>5</sub> NTa <sub>2</sub> |
| formula weight                                               | 773.57                                                         | 779.59                                                          | 761.54                                                          |
| crystal system                                               | monoclinic                                                     | monoclinic                                                      | triclinic                                                       |
| Space group                                                  | <i>C2/c</i>                                                    | <i>C2/c</i>                                                     | <i>P</i> $\bar{1}$                                              |
| <i>a</i> (Å)                                                 | 16.7619(4)                                                     | 16.7674(8)                                                      | 8.5841(4)                                                       |
| <i>b</i> (Å)                                                 | 17.2045(4)                                                     | 17.0966(14)                                                     | 10.1872(6)                                                      |
| <i>c</i> (Å)                                                 | 10.0036(2)                                                     | 10.1063(6)                                                      | 17.2208(10)                                                     |
| $\alpha$ (°)                                                 | 90                                                             | 90                                                              | 98.965(5)                                                       |
| $\beta$ (°)                                                  | 100.8740(10)                                                   | 101.068(5)                                                      | 104.066(5)                                                      |
| $\gamma$ (°)                                                 | 90                                                             | 90                                                              | 106.012(5)                                                      |
| <i>V</i> (Å <sup>3</sup> )                                   | 2833.04(11)                                                    | 2843.2(3)                                                       | 1363.39(13)                                                     |
| <i>Z</i>                                                     | 4                                                              | 4                                                               | 2                                                               |
| <i>D</i> <sub>calc</sub> (g/cm <sup>3</sup> )                | 1.814                                                          | 1.821                                                           | 1.855                                                           |
| <i>F</i> (000)                                               | 1488                                                           | 1496                                                            | 730                                                             |
| $\mu$ (mm <sup>-1</sup> )                                    | 7.732                                                          | 7.775                                                           | 8.032                                                           |
| Crystal size (mm)                                            | 0.18 x 0.15 x 0.12                                             | 0.23 x 0.18 x 0.13                                              | 0.33 x 0.24 x 0.18                                              |
| $\theta$ Range (°)                                           | 2.47–28.31                                                     | 3.44–32.76                                                      | 3.55–25.00                                                      |
| no. of total refins collected                                | 10619                                                          | 15722                                                           | 8713                                                            |
| no. of unique refins [ <i>I</i> > 2 $\sigma$ ( <i>I</i> )]   | 3368                                                           | 4870                                                            | 4794                                                            |
| max and min transmission                                     | 0.492 and 0.388                                                | 0.4314 and 0.2679                                               | 0.367 and 0.212                                                 |
| data/restraints/parameters                                   | 3368 / 12 / 198                                                | 4870 / 7 / 165                                                  | 4794 / 43 / 299                                                 |
| goodness-of-fit on <i>F</i> <sup>2</sup>                     | 1.021                                                          | 0.858                                                           | 1.114                                                           |
| final <i>R</i> indices [ <i>I</i> > 2 $\theta$ ( <i>I</i> )] | R1 = 0.0245<br>wR2 = 0.0468                                    | R1 = 0.0307<br>wR2 = 0.0713                                     | 0.0790<br>0.2192                                                |
| <i>R</i> indices (all data)                                  | R1 = 0.0421<br>wR2 = 0.0518                                    | R1 = 0.0614<br>wR2 = 0.0769                                     | 0.0870<br>0.2284                                                |
| largest difference in peak and hole (e/ Å <sup>3</sup> )     | 0.868 and -0.543                                               | 1.812 and -0.927                                                | 7.549 and -7.509                                                |



### $^{11}\text{B}$ NMR Spectra

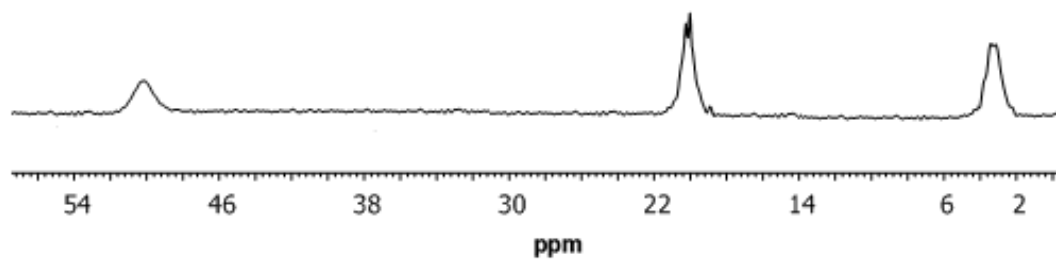

**Figure S3.**  $^{11}\text{B}$  NMR (128 MHz,  $[d_6]$ benzene) spectrum of  $[(\text{Cp}^*\text{Ta})_2\text{B}_5\text{H}_{10}(\text{C}_6\text{H}_5)]$  **2**.

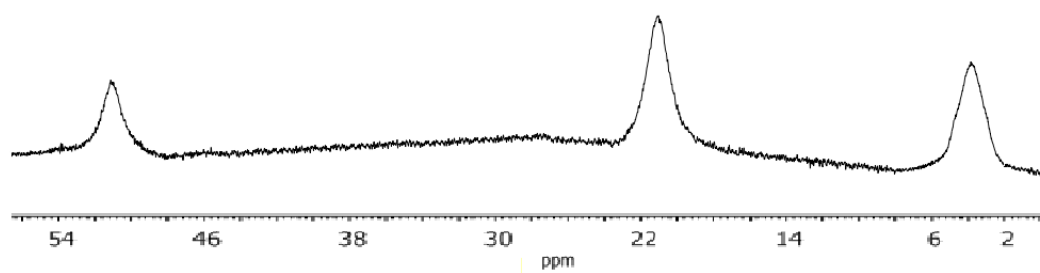

**Figure S4:**  $^{11}\text{B}$  NMR (128 MHz,  $[d_6]$ benzene) spectrum of  $[(\text{Cp}^*\text{Ta})_2\text{B}_5\text{H}_{10}(\text{C}_6\text{H}_4\text{CH}_3)]$  **3**.

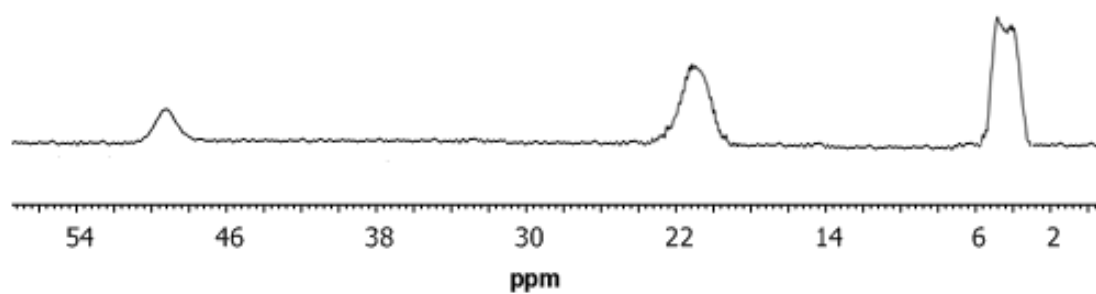

**Figure S5:**  $^{11}\text{B}$  NMR (128 MHz,  $[d_6]$ benzene) spectrum of  $[(\text{Cp}^*\text{Ta})_2\text{B}_5\text{H}_{10}(\text{C}_6\text{H}_4\text{Cl})]$  **4**.

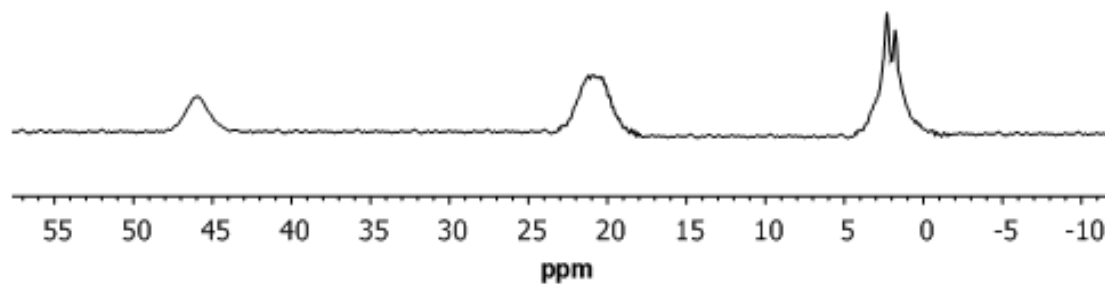

**Figure S6:**  $^{11}\text{B}$  NMR (128 MHz,  $[d_6]$ benzene) spectrum of  $[(\text{Cp}^*\text{Ta})_2\text{B}_5\text{H}_{10}(\text{C}_4\text{H}_3\text{S})]$  **5**.

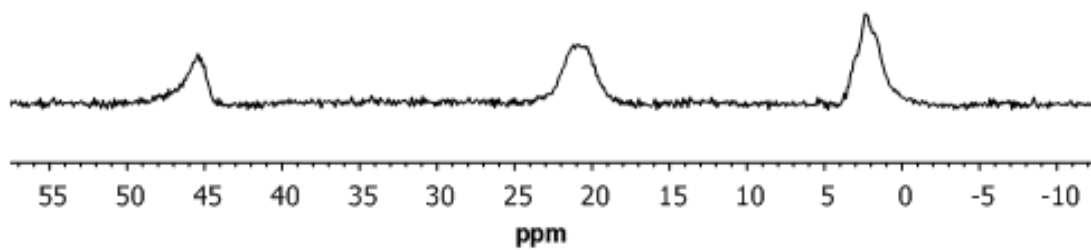

**Figure S7:**  $^{11}\text{B}$  NMR (128 MHz,  $[d_6]$ benzene) spectrum of  $[(\text{Cp}^*\text{Ta})_2\text{B}_5\text{H}_{10}(\text{C}_4\text{H}_3\text{NH})]$  **6**.

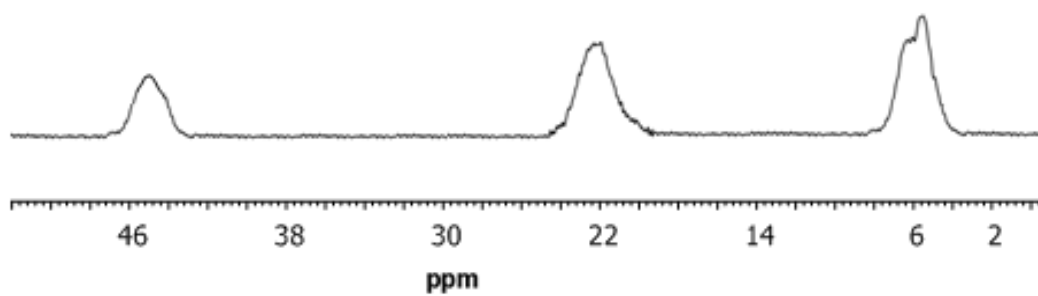

**Figure S8:**  $^{11}\text{B}$  NMR (128 MHz,  $[d_6]$ benzene) spectrum of  $[(\text{Cp}^*\text{Ta})_2\text{B}_5\text{H}_{10}(\text{C}_6\text{H}_4\text{Br})]$  .

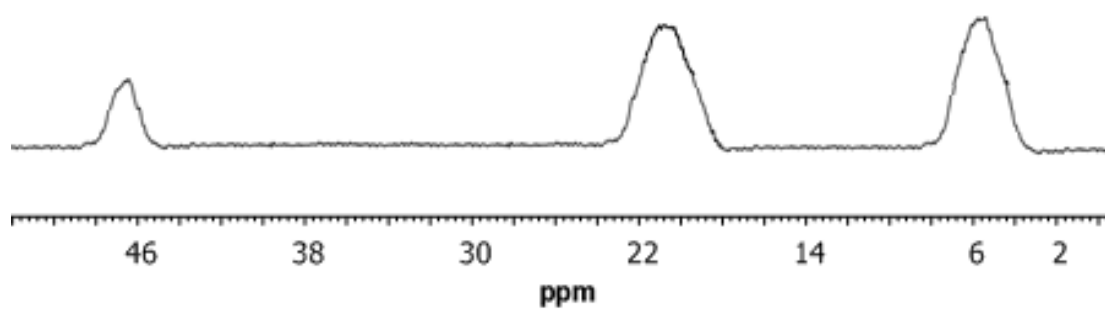

**Figure S9:**  $^{11}\text{B}$  NMR (128 MHz,  $[d_6]$ benzene) spectrum of  $[(\text{Cp}^*\text{Ta})_2\text{B}_5\text{H}_{10}(\text{C}_6\text{H}_4\text{I})]$ .

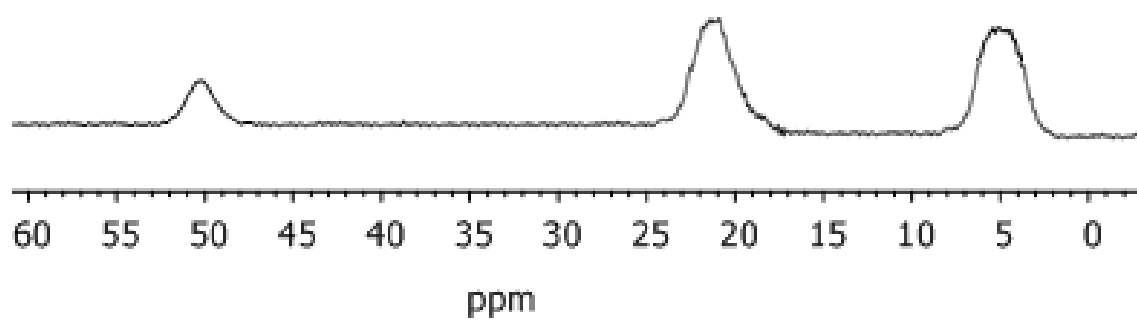

**Figure S10:**  $^{11}\text{B}$  NMR (128 MHz,  $[d_6]$ benzene) spectrum of  $[(\text{Cp}^*\text{Ta})_2\text{B}_5\text{H}_{10}(\text{C}_6\text{H}_3\text{Me}_2)]$ .

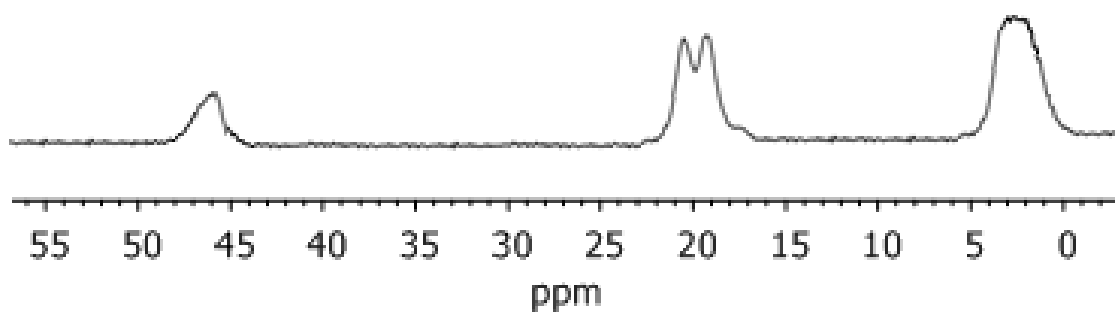

**Figure S11:**  $^{11}\text{B}$  NMR (128 MHz,  $[d_6]$ benzene) spectrum of  $[(\text{Cp}^*\text{Ta})_2\text{B}_5\text{H}_{10}(\text{C}_4\text{H}_2\text{MeS})]$ .

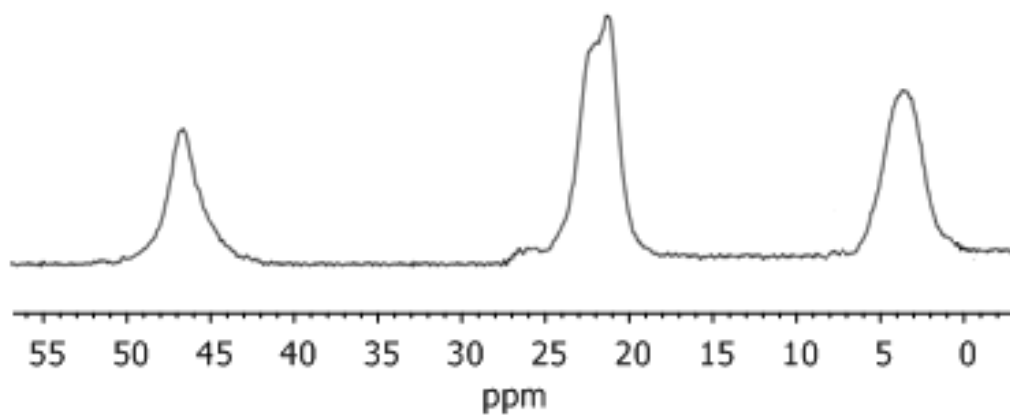

**Figure S12:**  $^{11}\text{B}$  NMR (128 MHz,  $[d_6]$ benzene) spectrum of  $[(\text{Cp}^*\text{Ta})_2\text{B}_5\text{H}_{10}(\text{C}_4\text{H}_2\text{IS})]$ .

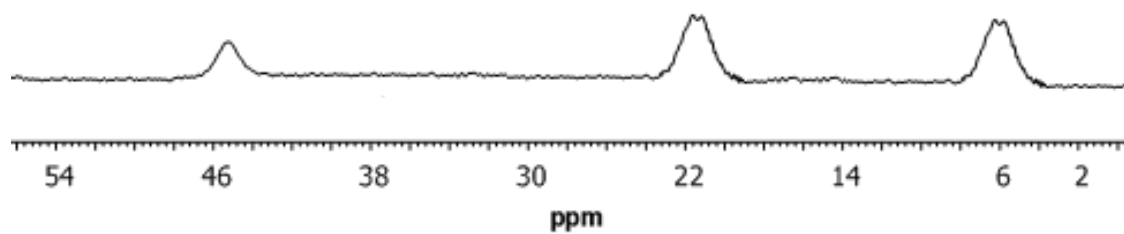

**Figure S13:**  $^{11}\text{B}$  NMR (128 MHz,  $[d_6]$ benzene) spectrum of  $[(\text{Cp}^*\text{Ta})_2\text{B}_5\text{H}_{10}(\text{C}_4\text{HMe}_2\text{S})]$ .

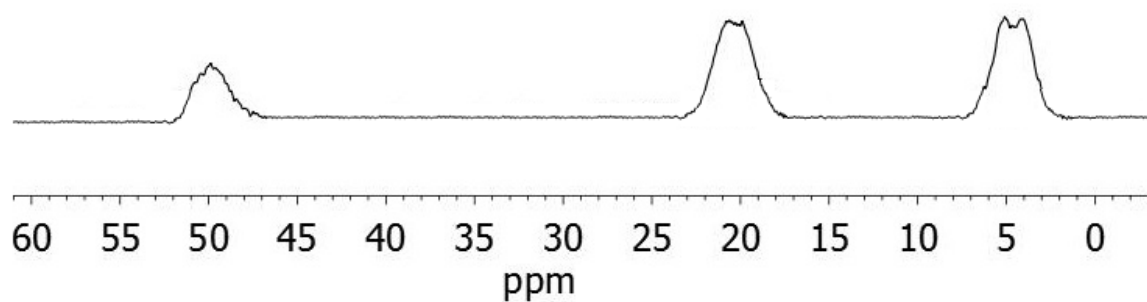

**Figure S14:**  $^{11}\text{B}$  NMR (128 MHz,  $[d_6]$ benzene) spectrum of  $[(\text{Cp}^*\text{Ta})_2\text{B}_5\text{H}_{10}(\text{C}_4\text{HBr}_2\text{S})]$ .

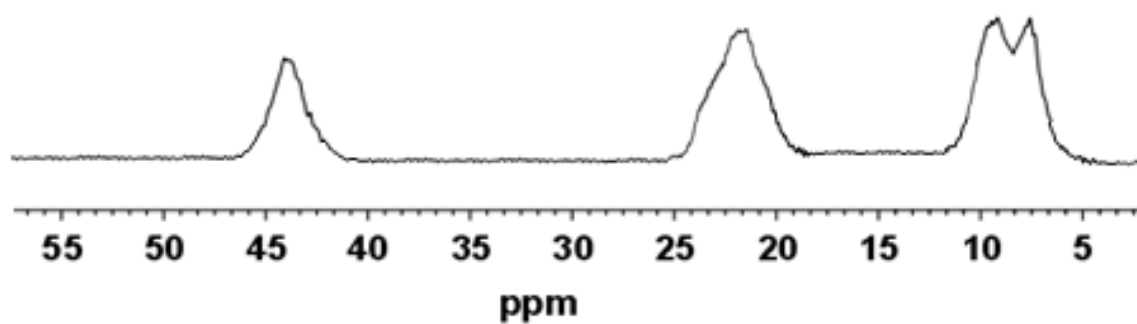

**Figure S15:**  $^{11}\text{B}$  NMR (128 MHz,  $[d_6]$ benzene) spectrum of  $[(\text{Cp}^*\text{Ta})_2\text{B}_5\text{H}_{10}(\text{C}_4\text{HMe}_2\text{NH})]$ .

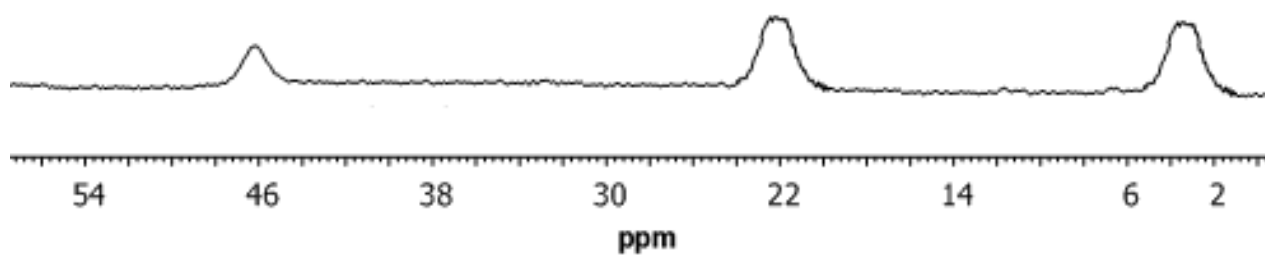

**Figure S16:**  $^{11}\text{B}$  NMR (128 MHz,  $[d_6]$ benzene) spectrum of  $[(\text{Cp}^*\text{Ta})_2\text{B}_5\text{H}_{10}\{\text{C}_4\text{H}_3\text{NSi}(i\text{Pr})_3\}]$ .

## References

- (1) S. K. Bose, K. Geetharani, B. Varghese, S. M. Mobin and S. Ghosh, *Chem. Eur. J.*, 2008, **14**, 9058.
- (2) G. E. Ryschkewitsch and K. C. Nainan, *Inorg. Synth.*, 1974, **15**, 113.
- (3) A. Altomare, G. Cascarano, C. Giacovazzo and A. Guagliardi, *J. Appl. Cryst.*, 1993, **26**, 343.
- (4) G. M. Sheldrick, SHELXS-97; University of Göttingen: Germany, 1997.
- (5) G. M. Sheldrick, SHELXS-97; University of Göttingen: Germany, 1997.
